# Supplementary material
Source: publisher figshare collection journal article supplement (https://gsapubs.figshare.com/articles/dataset/_/12536447)
Supplement: Supplementary file 1 [file 1]

GSA Data Repository 2018145

Parolari et al., 2018, A balancing act of crust creation and destruction along the western Mexican convergent margin: *Geology*, <https://doi.org/10.1130/G39972.1>.

2018145\_Tables DR1-DR4.xls

## Supporting Figures.

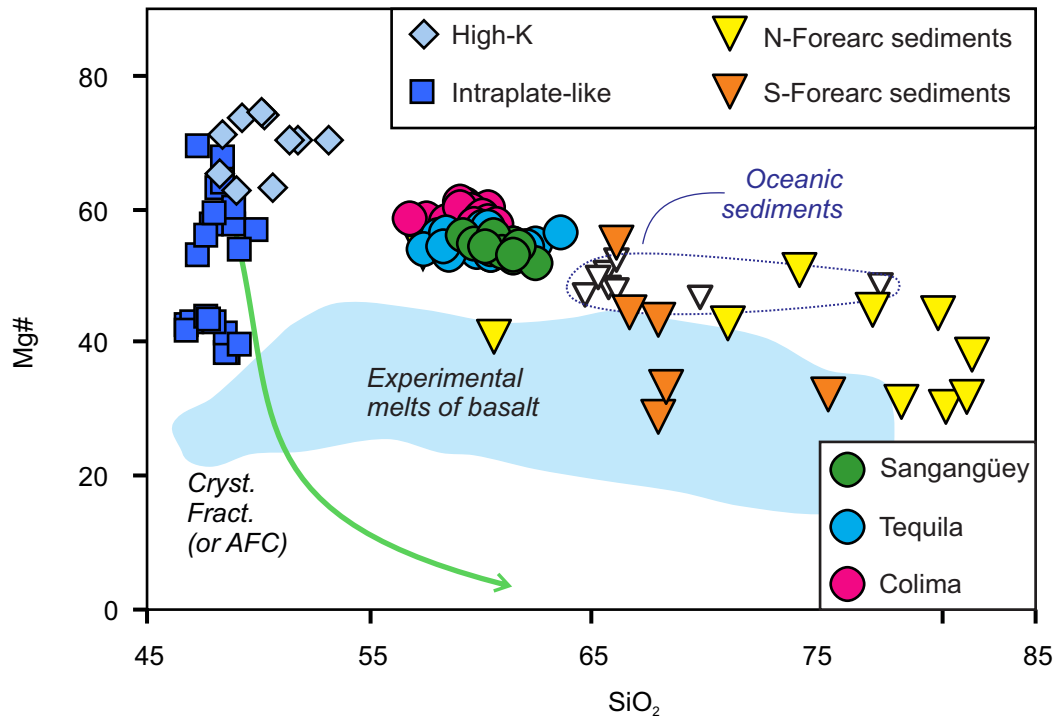

**Fig. DR1:** Mg# versus  $\text{SiO}_2$  diagram of the studied volcanoes compared to primitive magmas from the W-TMVB (see Gómez-Tuena et al., 2016). Green arrow suggests a potential crystallization pathway of a parental basalt emphasizing the rapid drop of Mg# due to fractionation of olivine and pyroxene. Light blue field shows the compositions of experimental melts of hydrous basalts at 1–4 GPa (Sen & Dunn 1994; Rapp 1995; Rapp & Watson 1995; Rapp et al. 1999). The high-Mg# displayed by these arc andesites cannot be explained by melting, crystal fractionation or contamination from a parental basaltic liquid.

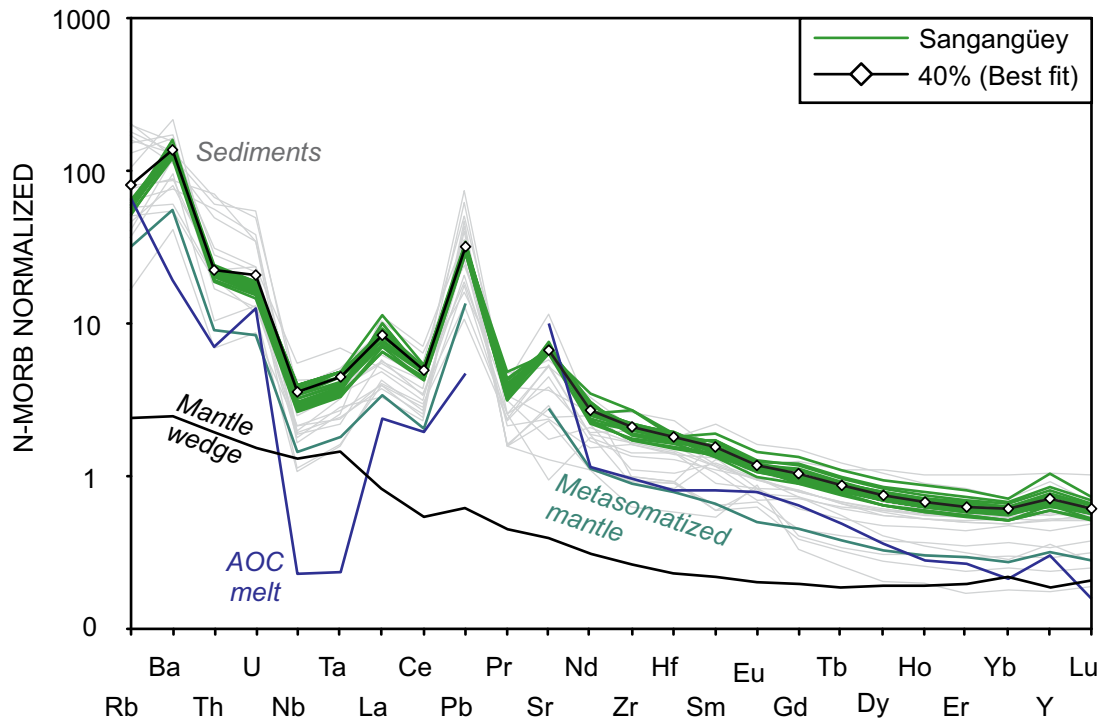

**Fig. DR2:** Trace element pattern of Sangangüey volcano and a batch melting ( $F=40\%$ ) model of a mantle source that has been metasomatized by an AOC melt:Sediment mixture. See DR3 for modeling details.

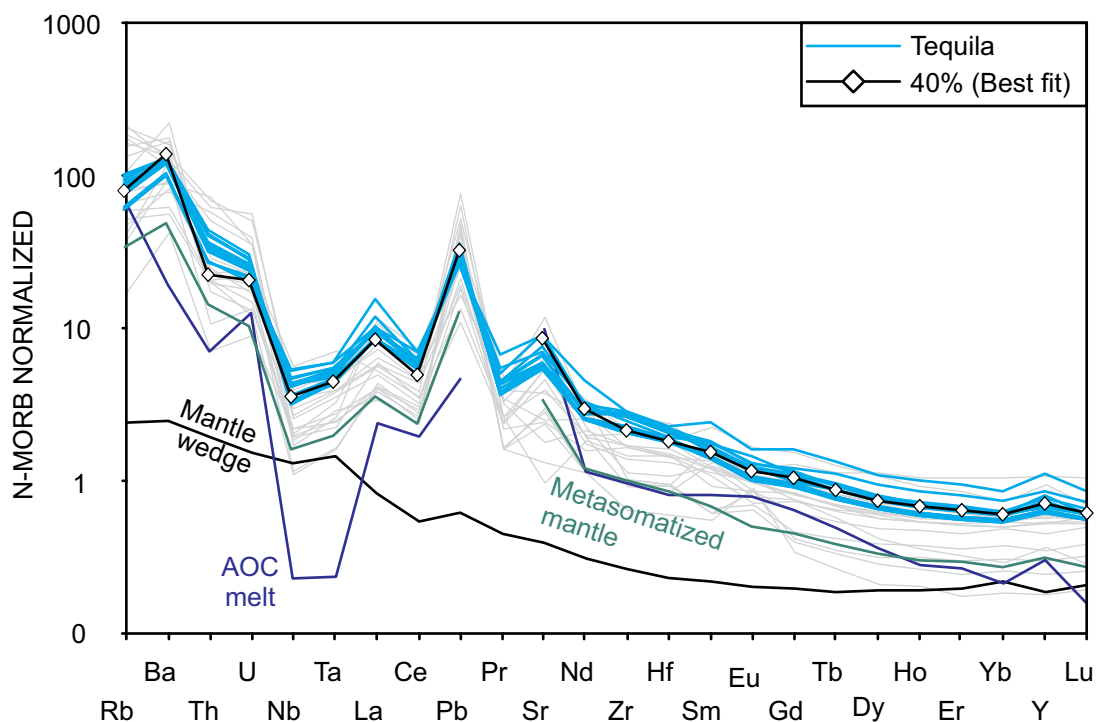

**Fig. DR3 :** Trace element pattern of Tequila volcano and a batch melting ( $F=40\%$ ) model of a mantle source that has been metasomatized by an AOC melt:Sediment mixture. See DR3 for modeling details.

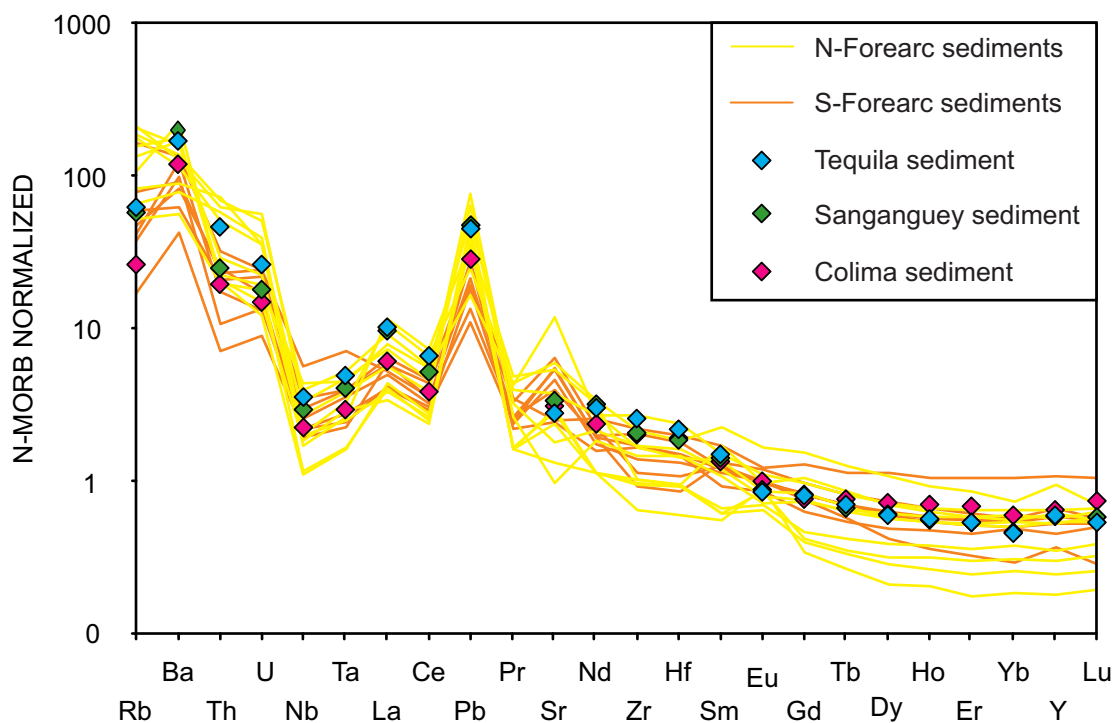

**Fig. DR4:** Trace element patterns of all sampled riverine forearc/sediments (data in DR1). Geographic division as in Figure.1. Also shown are the compositions of best fit sediments used to model andesitic volcanoes. The composition of Colima sediment has been calculated using only riverine sediments sampled south of latitude  $19^{\circ}\text{N}$ . Sanganguey sediment was calculated using riverine samples to the north of Latitude  $19^{\circ}\text{N}$ . Tequila forearc/sediment considers all measured riverine samples (see DR3).

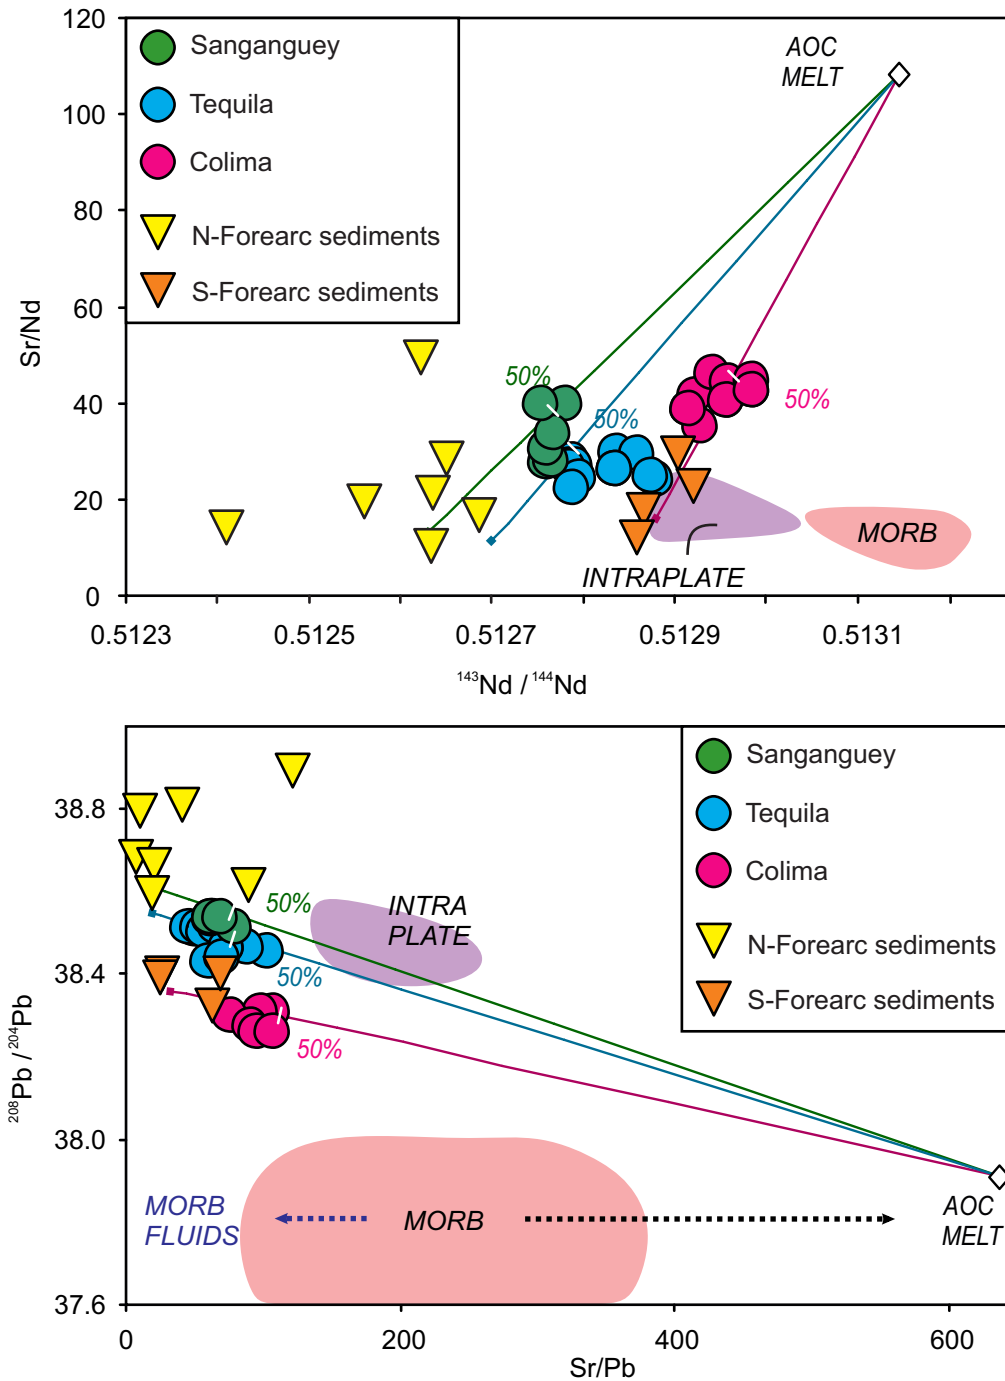

**Fig. DR5.** The Sr/Nd vs  $^{143}\text{Nd}/^{144}\text{Nd}$  and Sr/Pb vs  $^{208}\text{Pb}/^{204}\text{Pb}$  variations of the studied volcanoes indicate the participation of an isotopically depleted component with higher Sr contents than a typical MORB. Since Pb is more incompatible than Sr during fluid extraction and both elements become similarly incompatible during melting (Kessel et al., 2005), the isotopically depleted component is interpreted to be a melt coming from the Altered Oceanic Crust (AOC). See DR3 for modeling details.

## References Cited

Gómez-Tuena, A., Mori, L., and Straub, S.M., 2016, Geochemical and petrological insights into the tectonic origin of the Transmexican Volcanic Belt: *Earth-Science Reviews*, doi: 10.1016/j.earscirev.2016.12.006.

Kessel, R., Schmidt, M.W., Ulmer, P., and Pettke, T., 2005, Trace element signature of subduction-zone fluids, melts and supercritical liquids at 120-180 km depth: *Nature*, v. 437, p. 724-727, doi: 10.1038/nature03971.

Rapp, R.P., 1995, Amphibole-out phase boundary in partially melted metabasalt, its control over liquid fraction and composition, and source permeability: *Journal of Geophysical Research*, v. 100, p. 15601, doi: 10.1029/95JB00913.

Rapp, R.P., Shimizu, N., Norman, M.D., and Applegate, G.S., 1999, Reaction between slab-derived melts and peridotite in the mantle wedge: Experimental constraints at 3.8 GPa: *Chemical Geology*, v. 160, p. 335-356, doi: 10.1016/S0009-2541(99)00106-0.

Rapp, R.P., and Watson, E.B., 1995, Dehydration melting of metabasalt at 8-32 kbar: Implications for continental growth and crust-mantle recycling: *Journal of Petrology*, v. 36, p. 891-931, doi: 10.1093/petrology/36.4.891.

Sen, C., and Dunn, T., 1994, Dehydration melting of a basaltic composition amphibolite at 1.5 and 2.0 GPa: implications for the origin of adakites: *Contributions to Mineralogy and Petrology*, v. 117, p. 394-409, doi: 10.1007/BF00307273.

## **ORIGINAL SOURCES FOR VOLCANO DATA PLOTTED IN FIGURES 1, 2 AND DR5**

### ***Tequila and Sangangüey volcanoes***

Gómez-Tuena, A., Díaz-Bravo, B., Vázquez-Duarte, A., Pérez-Arvizu, O., and Mori, L., 2014, Andesite petrogenesis by slab-derived plume pollution of a continental rift: Geological Society, London, Special Publications, v. 385, p. 65–101, doi: 10.1144/SP385.4.

### ***Intraplate-like basalts***

Díaz-Bravo, B.A., Gómez-Tuena, A., Ortega-Obregón, C., and Pérez-Arvizu, O., 2014, The origin of intraplate magmatism in the western Trans-Mexican Volcanic Belt: Geosphere, v. 10, p. GES00976.1, doi: 10.1130/GES00976.1.

Gómez-Tuena, A., Díaz-Bravo, B., Vázquez-Duarte, A., Pérez-Arvizu, O., and Mori, L., 2014, Andesite petrogenesis by slab-derived plume pollution of a continental rift: Geological Society, London, Special Publications, v. 385, p. 65–101, doi: 10.1144/SP385.4.

### ***Colima volcano***

Hochstaedter, A.G., Ryan, F., Luhr, J.F., and Hasenaka, T., 1996, On B/Be ratios in the Mexican Volcanic Belt: Geochimica et Cosmochimica Acta, v. 60, p. 613–618.

Lassiter, J.C., and Luhr, J.F., 2001, Osmium abundance and isotope variations in mafic Mexican volcanic rocks: Evidence for crustal contamination and constraints on the geochemical behavior of osmium during partial melting and fractional crystallization: Geochemistry, Geophysics, Geosystems, v. 2, p. n/a–n/a, doi: 10.1029/2000GC000116.

Luhr, J.F., 1997, Extensional tectonics and the diverse primitive volcanic rocks in the western Mexican Volcanic Belt: Canadian Mineralogist, v. 35, p. 473–500.

Valdez-Moreno, G., Schaaf, P., Macías, J.L., and Kusakabe, M., 2006, New Sr-Nd-Pb-O isotope data for Colima volcano and evidence for the nature of the local basement: Geological Society of America Special Papers, v. 402, p. 45–63, doi: 10.1130/2006.2402(02).

Verma, S.P., and Luhr, J.F., 2010, Sr, Nd, and Pb isotopic evidence for the origin and evolution of the Cántaro–Colima volcanic chain, Western Mexican Volcanic Belt: Journal of Volcanology and Geothermal Research, v. 197, p. 33–51, doi: 10.1016/j.jvolgeores.2010.08.019.
